# Supplementary material
Source: Springer Nature journal article supplement (https://www.springermedizin.de/resource/supplementary/12936_2012_2167_MOESM5_ESM.pdf/9542856)
Supplement: MOESM5 [file 9542856]

□ QT-NASBA

▨ RT-PCR

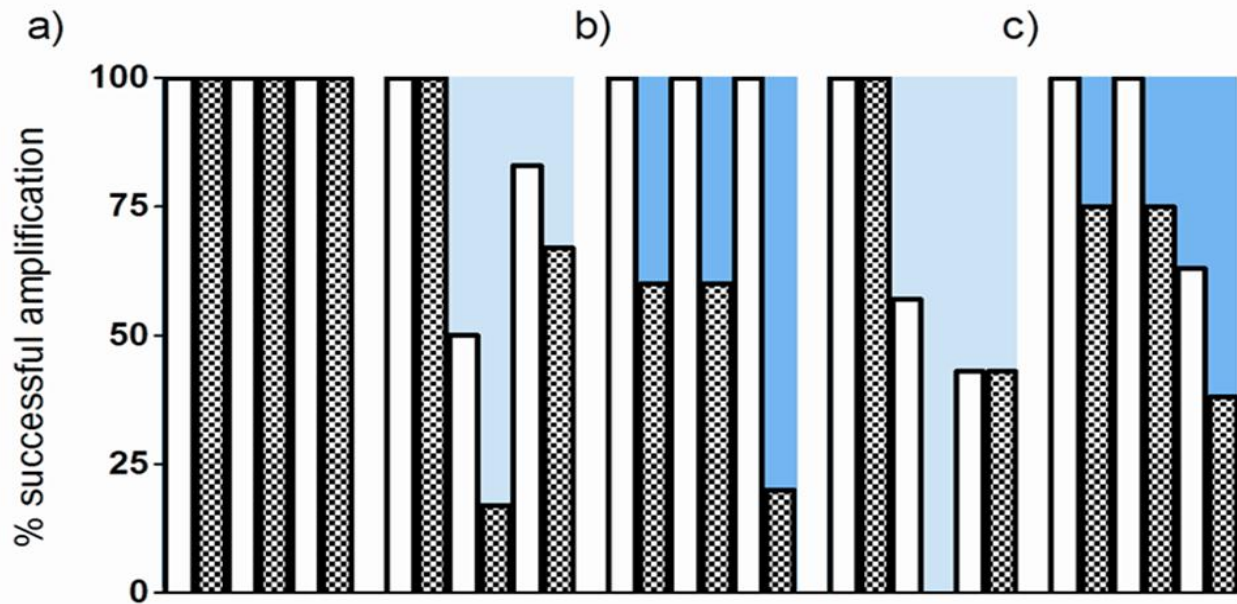

| gametocyte density/ $\mu\text{l}$ | 10    | 1 | 0.1 | 10    | 1 | 0.1 | 10    | 1 | 0.1 | 10    | 1 | 0.1 |           |  |  |
|-----------------------------------|-------|---|-----|-------|---|-----|-------|---|-----|-------|---|-----|-----------|--|--|
| filter paper                      | 903   |   |     | 903   |   |     | FTA   |   |     | FTA   |   |     | L6 buffer |  |  |
| week 1 temperature                | -80°C |   |     | -20°C |   |     | -80°C |   |     | -20°C |   |     | -80°C     |  |  |
| subsequent temperature            | -80°C |   |     | -20°C |   |     | -80°C |   |     | -20°C |   |     | -80°C     |  |  |
| wet/dry                           | dry   |   |     | dry   |   |     | dry   |   |     | dry   |   |     | N/A       |  |  |
